# Supplementary material for: Efficient RT-QuIC seeding activity for α-synuclein in olfactory mucosa samples of patients with Parkinson’s disease and multiple system atrophy
Source: Springer Nature journal article supplement (doi:10.1186/s40035-019-0164-x), 2019-08-07

# Additional file 2: Figure S1

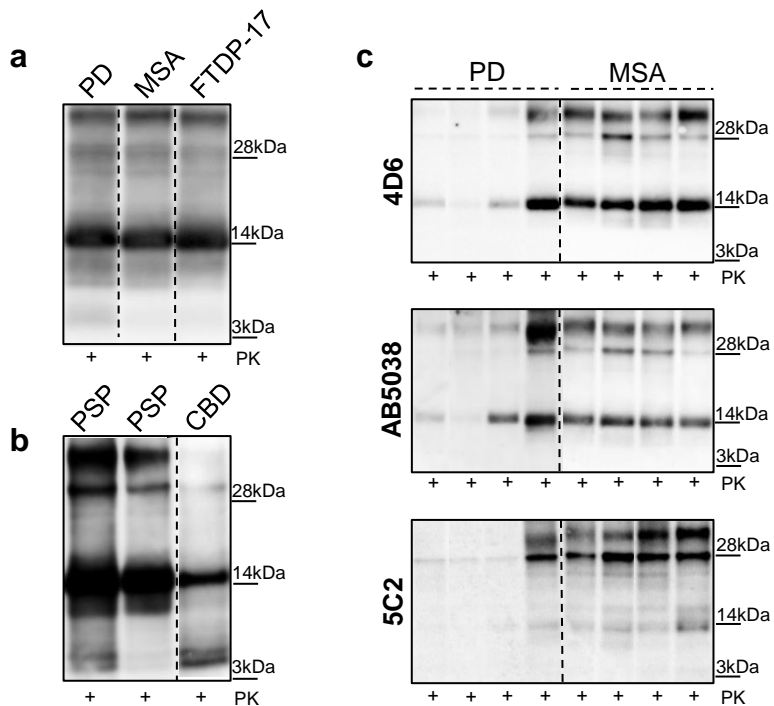

Supplement: MOESM2 [file 17047196]
