# Supplementary material for: Efficient RT-QuIC seeding activity for α-synuclein in olfactory mucosa samples of patients with Parkinson’s disease and multiple system atrophy
Source: Transl Neurodegener. 2019 Aug 8;8:24. doi: 10.1186/s40035-019-0164-x (PMC6686411; doi:10.1186/s40035-019-0164-x)
Supplement: Supplementary file 1 — Table S1. Detailed clinical information of each patient and related RT-QuIC results of OM analyses. (XLSX 16 kb) [file 40035_2019_164_MOESM1_ESM.xlsx]

## Sheet: Foglio1
Clinical Diagnosis	Gender	Age at OM collection	Age at disease onset	Disease duration (years)	Symptoms at disease onset	Akinetic rigid parkinsonism	Tremor	Ataxia	Apraxia	Delusions	Dementia	Relevant psychiatric disorders	REM behavioral disorder	Autonomic impariment	Brain MRI	RT-QuIC
PD#1	M	62	55	7	Tremor	+	+	-	-	-	-	-	-	-	Normal	+
PD#2	F	65	50	15	Tremor	+	+	-	-	-	-	-	-	+	Vascular leukoencephalopathy	-
PD#3	M	73	65	8	Tremor	+	+	-	-	-	-	+	+	+	Brain atrophy	-
PD#4	M	66	56	10	Rigidity	+	+	-	-	+	-	-	+	+	Vascular leukoencephalopathy	-
PD#5	M	58	42	16	Hyposmia	+	+	-	-	-	-	+	-	-	Vascular leukoencephalopathy	-
PD#6	F	68	55	13	Bradykinesia	+	+	-	-	+	-	-	+	+	Normal	-
PD#7	F	58	49	9	Bradykinesia	+	+	-	-	-	-	-	+	+	Normal	+
PD#8	F	72	52	20	Bradykinesia	+	+	-	-	+	+	-	+	+	Brain atrophy	+
PD#9	F	55	51	4	Tremor	+	+	-	-	-	-	-	+	+	Brain atrophy	+
PD#10	F	71	63	8	Tremor	+	+	-	-	-	-	-	+	+	Normal	+
PD#11	M	58	51	7	Tremor	+	+	-	-	-	-	+	+	+	Normal	+
PD#12	M	59	48	11	Tremor	+	+	-	-	-	-	-	-	+	Normal	-
PD#13	M	64	60	4	Depression	+	+	-	-	-	+	+	-	+	Vascular leukoencephalopathy	-
PD#14	M	66	45	21	Tremor	+	+	-	-	-	-	-	-	+	Normal	-
PD#15	M	66	55	11	Bradykinesia	+	-	-	-	-	-	+	+	+	Brain atrophy	+
PD#16	M	84	47	7	Sleep disturbances	+	+	-	-	-	-	+	+	+	Normal	+
PD#17	F	50	46	4	Tremor	+	+	-	-	-	-	-	-	-	Normal	+
PD#18	F	61	54	7	Rigidity	+	-	-	-	-	-	-	-	+	Brain atrophy	+
MSA-P#1	M	51	48	3	Dysarthria	+	-	+	-	-	-	-	-	+	MSA-P signs	+
MSA-P#2	M	64	59	5	Bradykinesia	+	+	+	-	-	-	+	-	+	Cerebellar atrophy	+
MSA-P#3	M	53	43	10	Bradykinesia	+	+	+	-	-	-	-	+	+	MSA-P/C signs	-
MSA-P#4	M	71	62	9	Tremor	+	+	+	-	+	-	-	-	+	MSA-P/C signs	-
MSA-P#5	F	50	45	5	Bradykinesia	+	+	+	-	-	-	+	+	+	MSA-P/C signs	+
MSA-P#6	M	70	66	4	Rigidity	+	+	+	-	-	-	-	+	+	MSA-P signs	+
MSA-C#7	M	52	48	4	Bradykinesia	+	+	+	-	-	-	-	+	+	MSA-C signs	+
MSA-P#8	F	75	70	5	Bradykinesia	+	+	-	-	-	-	+	+	+	MSA-P/C signs	+
MSA-P#9	F	65	52	13	Bradykinesia	+	+	+	-	-	-	+	+	+	MSA-P/C signs	+
MSA-C#10	F	70	66	4	Ataxia	+	+	+	-	-	-	+	+	+	MSA-P/C signs	+
MSA-C#11	F	64	62	2	Ataxia	-	-	+	-	-	-	-	-	+	MSA-C signs	+
CBD#1	M	65	62	3	Memory Disturbances	+	+	+	+	-	+	+	-	+	Bilateral frontal and parietal lobar atrophy	-
CBD#2	M	49	44	5	Fixed dystonia	-	-	-	+	-	-	-	-	-	Right parietal lobar atrophy	-
CBD#3	F	56	54	2	Apraxia	+	-	-	+	-	-	-	-	-	Left parietal lobar atrophy	-
CBD#4	F	72	71	1	Gait disorder	+	-	+	+	-	-	+	-	+	Right parietal lobar atrophy	-
CBD#5	F	60	57	3	Apraxia	+	+	-	+	-	-	-	-	-	Brain atrophy	-
CBD#6	F	78	73	5	Bradykinesia	+	+	+	+	-	-	-	-	-	Brain atrophy	+
PSP#1	F	65	50	15	Depression	+	-	+	+	-	+	+	-	-	Predominant midbrain atrophy	-
PSP#2	M	72	70	2	Ataxia	+	-	+	-	-	-	-	-	-	Mild brain hypotrophy	-
PSP#3	M	78	75	3	Rigidity	+	-	+	+	-	+	+	-	-	Brain atrophy	-
PSP#4	M	64	61	3	Bradykinesia	+	-	+	-	-	-	+	-	-	Predominant midbrain atrophy	-
PSP#5	M	77	72	5	Visual Disturbances	-	-	+	-	-	+	-	-	+	Predominant midbrain atrophy	-
PSP#6	F	78	75	3	Bradykinesia	+	-	+	-	-	+	+	-	-	Predominant midbrain atrophy	-
PSP#7	F	60	57	3	Ataxia	+	-	+	+	-	-	-	-	-	Predominant midbrain atrophy	-
PSP#8	F	69	67	2	Dysarthria	+	+	-	-	-	-	-	-	-	Predominant midbrain atrophy	+
PSP#9	M	62	60	2	Postural Instability	+	-	+	-	-	-	-	-	-	Predominant midbrain atrophy	-
PSP#10	M	72	69	3	Dysarthria	+	-	+	-	+	+	+	-	-	Brain atrophy	+
PSP#11	M	58	55	3	Apathia	+	-	+	-	-	+	-	-	-	Predominant midbrain atrophy	-
PSP#12	F	65	61	4	Postural Instability	+	-	+	+	-	+	+	-	+	Predominant midbrain atrophy	-
		64.2222	52.4444	10.1111
		7.84073	6.12826	5.12076
		62.2727	56.4545	5.81818
		9.16614	9.53272	3.371
		63.3333	60.1667	3.16667
		10.6145	10.9072	1.60208
		68.3333	64.3333	4
		7.04961	8.17239	3.56753
